# Supplementary material for: Early conch morphology of a gigantic Cretaceous ammonoid, Pachydesmoceras denisonianum (Desmoceratidae)
Source: PeerJ. 2025 May 23;13:e19488. doi: 10.7717/peerj.19488 (PMC12105615; doi:10.7717/peerj.19488)
Supplement: Supplemental Information 1 [file peerj-13-19488-s001.xlsx]

## Sheet: constriction
constriction no.	conch diameter (mm)	angle between two consecutive constrictions (°)
m		36
m+1		82
m+2	33	68
m+3	35	55
m+4	38	51
m+5	42	44
m+6	45	35
m+7	48	34
m+8	51	36
m+9	55	34
m+10	58	33
m+11	60	33
m+12	65	39
m+13	70	32
m+14	73	22
m+15	79	41
m+16	86	39
m+17	95	47
m+18	104	47
m+19	107	37
average		42.25
standard deviation		13.2924

## Sheet: septa
septal no.	phragmocone diameter (mm)	septal angle (°)	supposed conch diameter (mm)
n	38		60
n+1	40	21	63
n+2	42	18	64
n+3	44	21	67
n+4	46	20	70
n+5	48	20	74
n+6	50	20	76
n+7	51	21	80
n+8	53	23	84
n+9	56	23	89
n+10	58	25	94
n+11	60	24	99
n+12	63	22	102
n+13	66	22	107
n+14	69	20
n+15	71	22
n+16	75	21
n+17	79	22
n+18	83	23
n+19	86	21
n+20	91	24
n+21	95	20
n+22	100	22
n+23	104	26
n+24	109	25
average		21.9167
standard deviation		1.93181
